# Supplementary material for: Discovery of a novel SHIP1 agonist that promotes degradation of lipid-laden phagocytic cargo by microglia
Source: PubMed Central journal article supplement — iScience. 2022 Mar 26;25(4):104170. doi: 10.1016/j.isci.2022.104170 (PMC9020084; doi:10.1016/j.isci.2022.104170), 2022-03-26
Supplement: mmc1.pdf [file mmc1.pdf]

**Supplemental information**

**Discovery of a novel SHIP1 agonist that promotes  
degradation of lipid-laden  
phagocytic cargo by microglia**

**Chiara Pedicone, Sandra Fernandes, Alessandro Matera, Shea T. Meyer, Stewart Loh, Jeung-Hoi Ha, Denzil Bernard, John D. Chisholm, Rosa Chiara Paolicelli, and William G. Kerr**

| <b>Compound</b> | <b>MW</b> | <b>CLogP<sup>a</sup></b> | <b>CLogS<sup>b</sup></b> | <b>Calculated Water Solubility</b> |
|-----------------|-----------|--------------------------|--------------------------|------------------------------------|
| Pelorol         | 372.50    | 6.31                     | -6.16                    | 0.000259 mg/mL                     |
| AQX-MN100       | 312.49    | 7.18                     | -6.49                    | 0.000100 mg/mL                     |
| K306            | 493.62    | 1.88                     | -3.83                    | 0.0733 mg/mL                       |

**Supplemental Table1. K306 and AQX-MN100 Water solubility.-Related to Star Methods**

<sup>a</sup>CLogP was calculated using the XLOGP3 atomistic and knowledge-based method (Wang et al., 1997). XLOGP version 3.2.2 was used.

<sup>b</sup>CLogS was calculated using the topological method (Delaney, 2004).

| Plasmid                                                  | Forward                                         | Reverse                                          |
|----------------------------------------------------------|-------------------------------------------------|--------------------------------------------------|
| <b>SHIP1 cloning primers (pS97splitRBP_S1-Enz)</b>       | 5'-<br>GTCGCGGCCGCGAACAAGCACTCAGAGCAGC<br>-3'   | 5'-<br>CGGCGGATCCGAGCTTCTCCCTCGTCTTG<br>C<br>-3' |
| <b>SHIP1deltaC2 cloning primers (pS97splitRBP_S1ΔC2)</b> | 5'-<br>GTCGCGGCCGCGAACAAGCACTCAGAGCAGC<br>-3'   | 5'-<br>TTAGGATCCCTGTCCTTGGCTGTCAAC<br>-3'        |
| <b>SHIP2 cloning primers (pS97splitRBP_S2-Enz)</b>       | 5'-<br>CGTGCGGCCGCCAAGCACTCCAAGCAGGACGAG<br>-3' | 5'-<br>GCGCGGATCCCACCTTCATGGAGCCTCTG<br>-3'      |

**Supplemental Table2. Related to Star Methods Cloning Primers for SHIP1-Enzyme, SHIP2ΔC2 and SHIP2-Enzyme.**

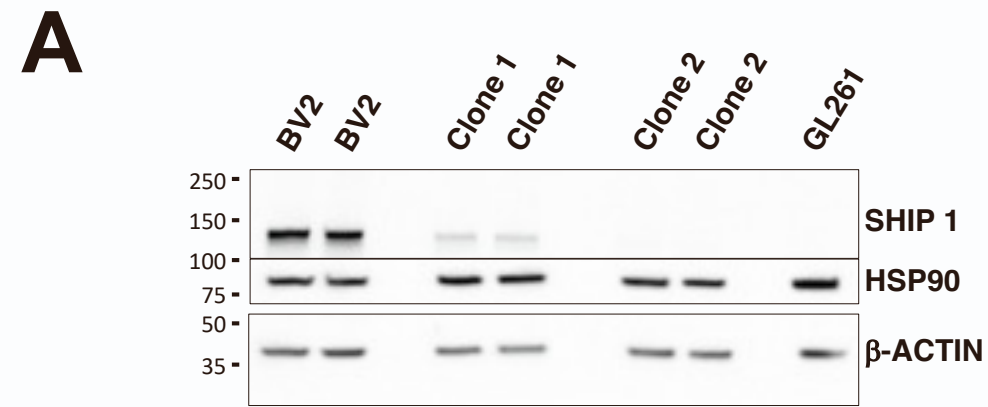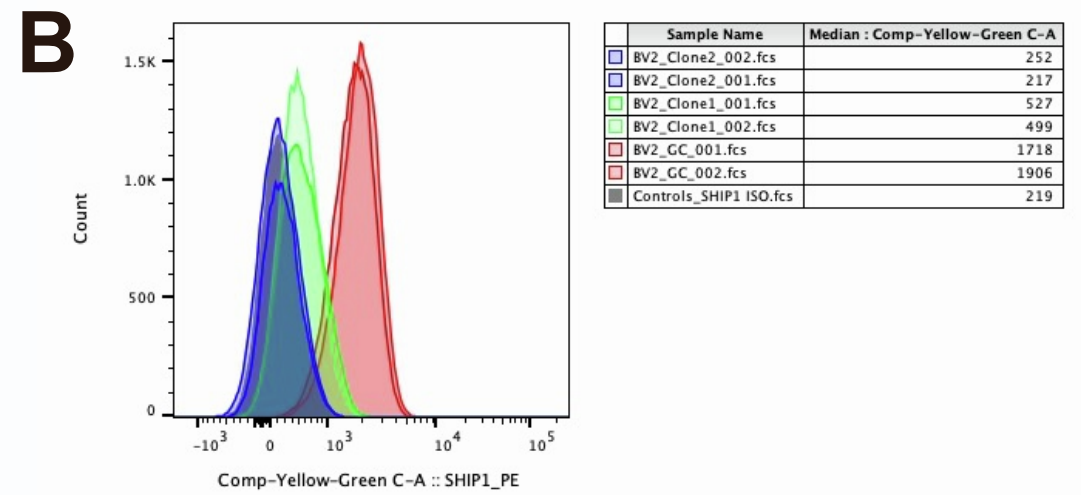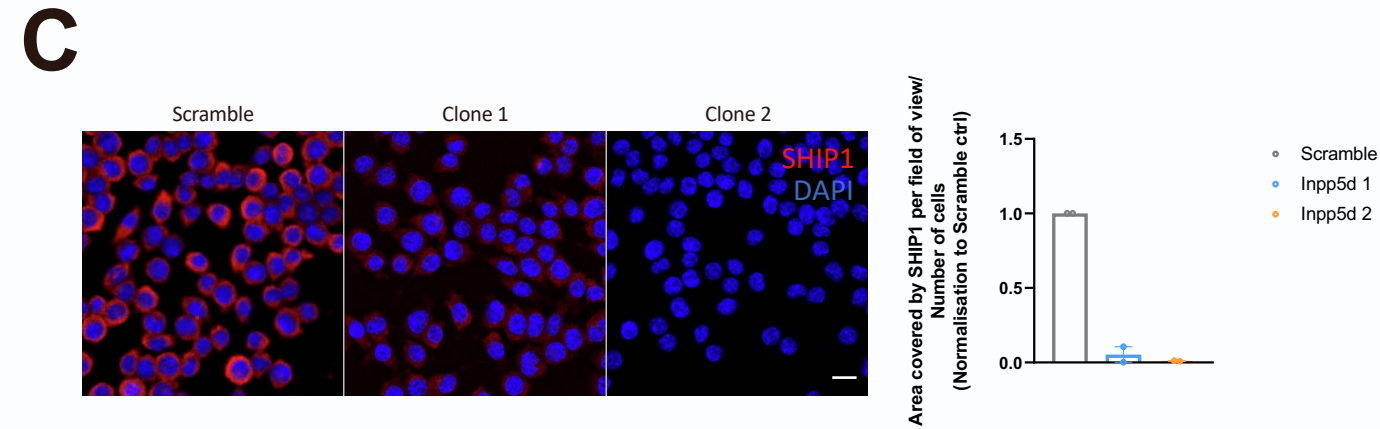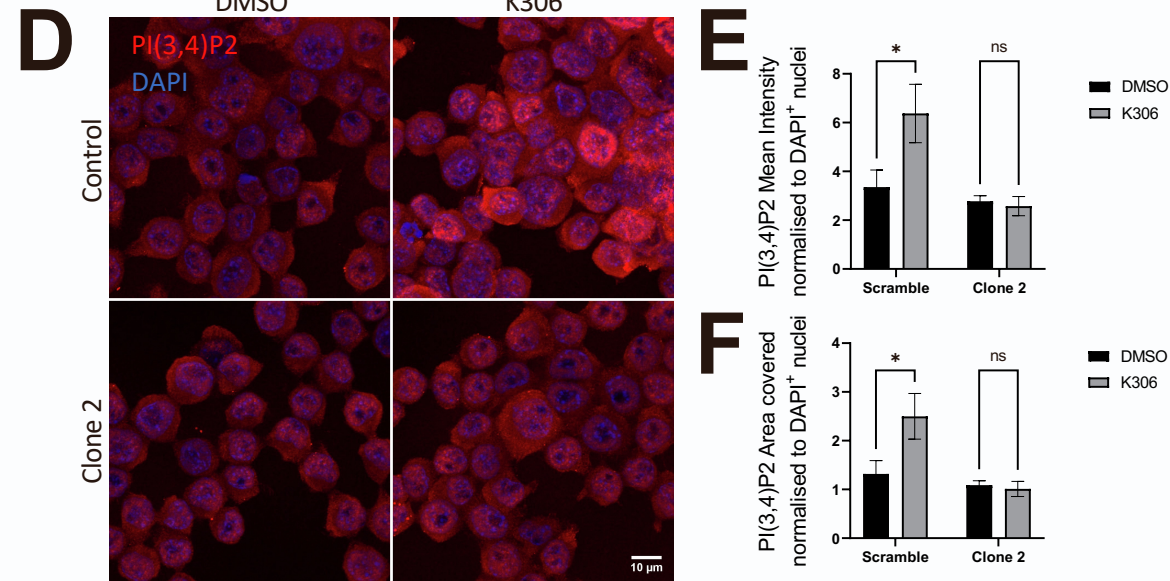

**Supplemental Figure 1. Validation of BV2 gene edited clones and characterization.** - Related to Star Methods: Validation of SHIP1 expression loss in gene-edited BV2 cell clones (Clone 1, Clone 2) vs. a scrambled control guide RNA clone (BV2). **(A)** Western Blot (WB) for SHIP1 protein expression and blotted for  $\beta$ -actin and HSP90 as loading controls, showing two independent lysate samples for each clone. **(B)** Intracellular Flow Cytometry (IFC) for the clones and scrambled control BV2 cells and relative quantitation. **(C)** Immuno-Fluorescence (IF) confocal microscopy imaging for SHIP1 of the three BV2 clones described above and relative quantitation of SHIP1 staining in each clone is shown at right. Scale bar 20  $\mu$ m **(D)** Max-projection of 4.16  $\mu$ m z-stack confocal acquisition of PI(3,4)P2 in parental BV2 cells and clone 2, treated with vehicle or K306 10  $\mu$ M for 1h. Relative quantifications of PI(3,4)P2 mean intensity and area covered normalised to DAPI<sup>+</sup> nuclei are shown in **(E)** and **(F)** respectively. Two-way ANOVA with Šidák correction, \* $p < 0.05$  in **(E)** and **(F)**.

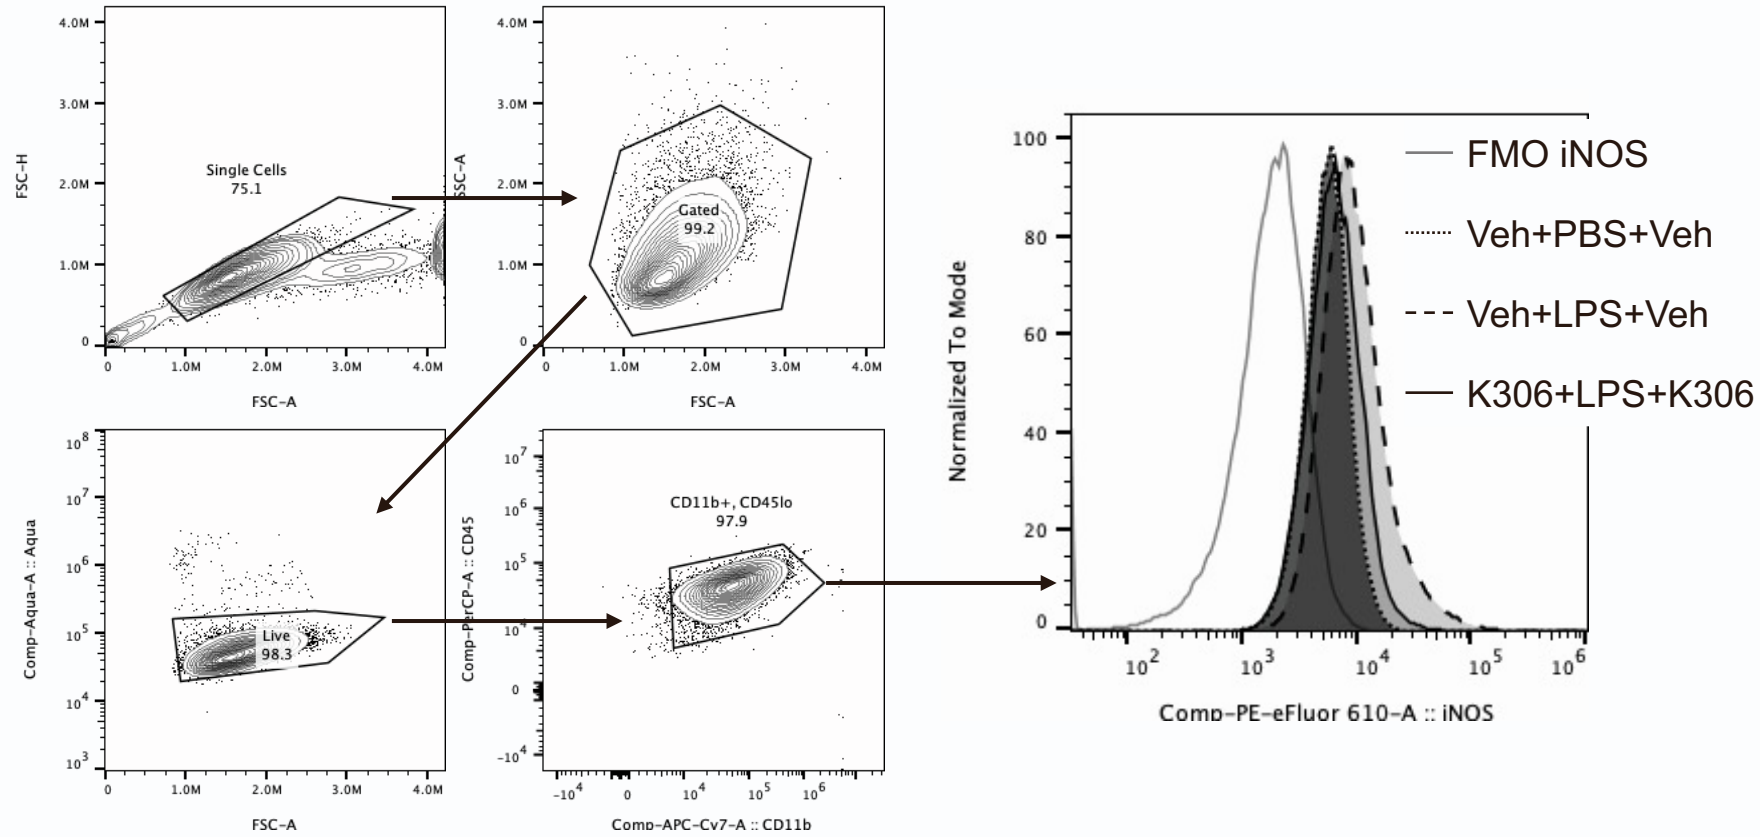

**Supplemental Figure 2. Gating strategy for BV2 cells treated with K306 or control and LPS.- Related to Star Methods.** Singlets were gated by FSC-H vs FSC-A, debris were removed in SSC-A vs FSC-A, dead cells were excluded in Zombie Aqua vs FSC-A with viable BV2 microglia cells identified as CD45-PerCP+CD11b-APC-Cyanine7+ cells. The right panel shows histograms for iNOS-PE\_efluor610 staining and an FMO stain (gray line), BV2 treated with Veh+PBS+Veh (dotted line), Veh+LPS+Veh (dashed line) or K306+LPS+K306 (solid black line). Data were acquired on Cytex Aurora, unmixed on SpectroFlow and further analyzed in FlowJo version 10.8.1.



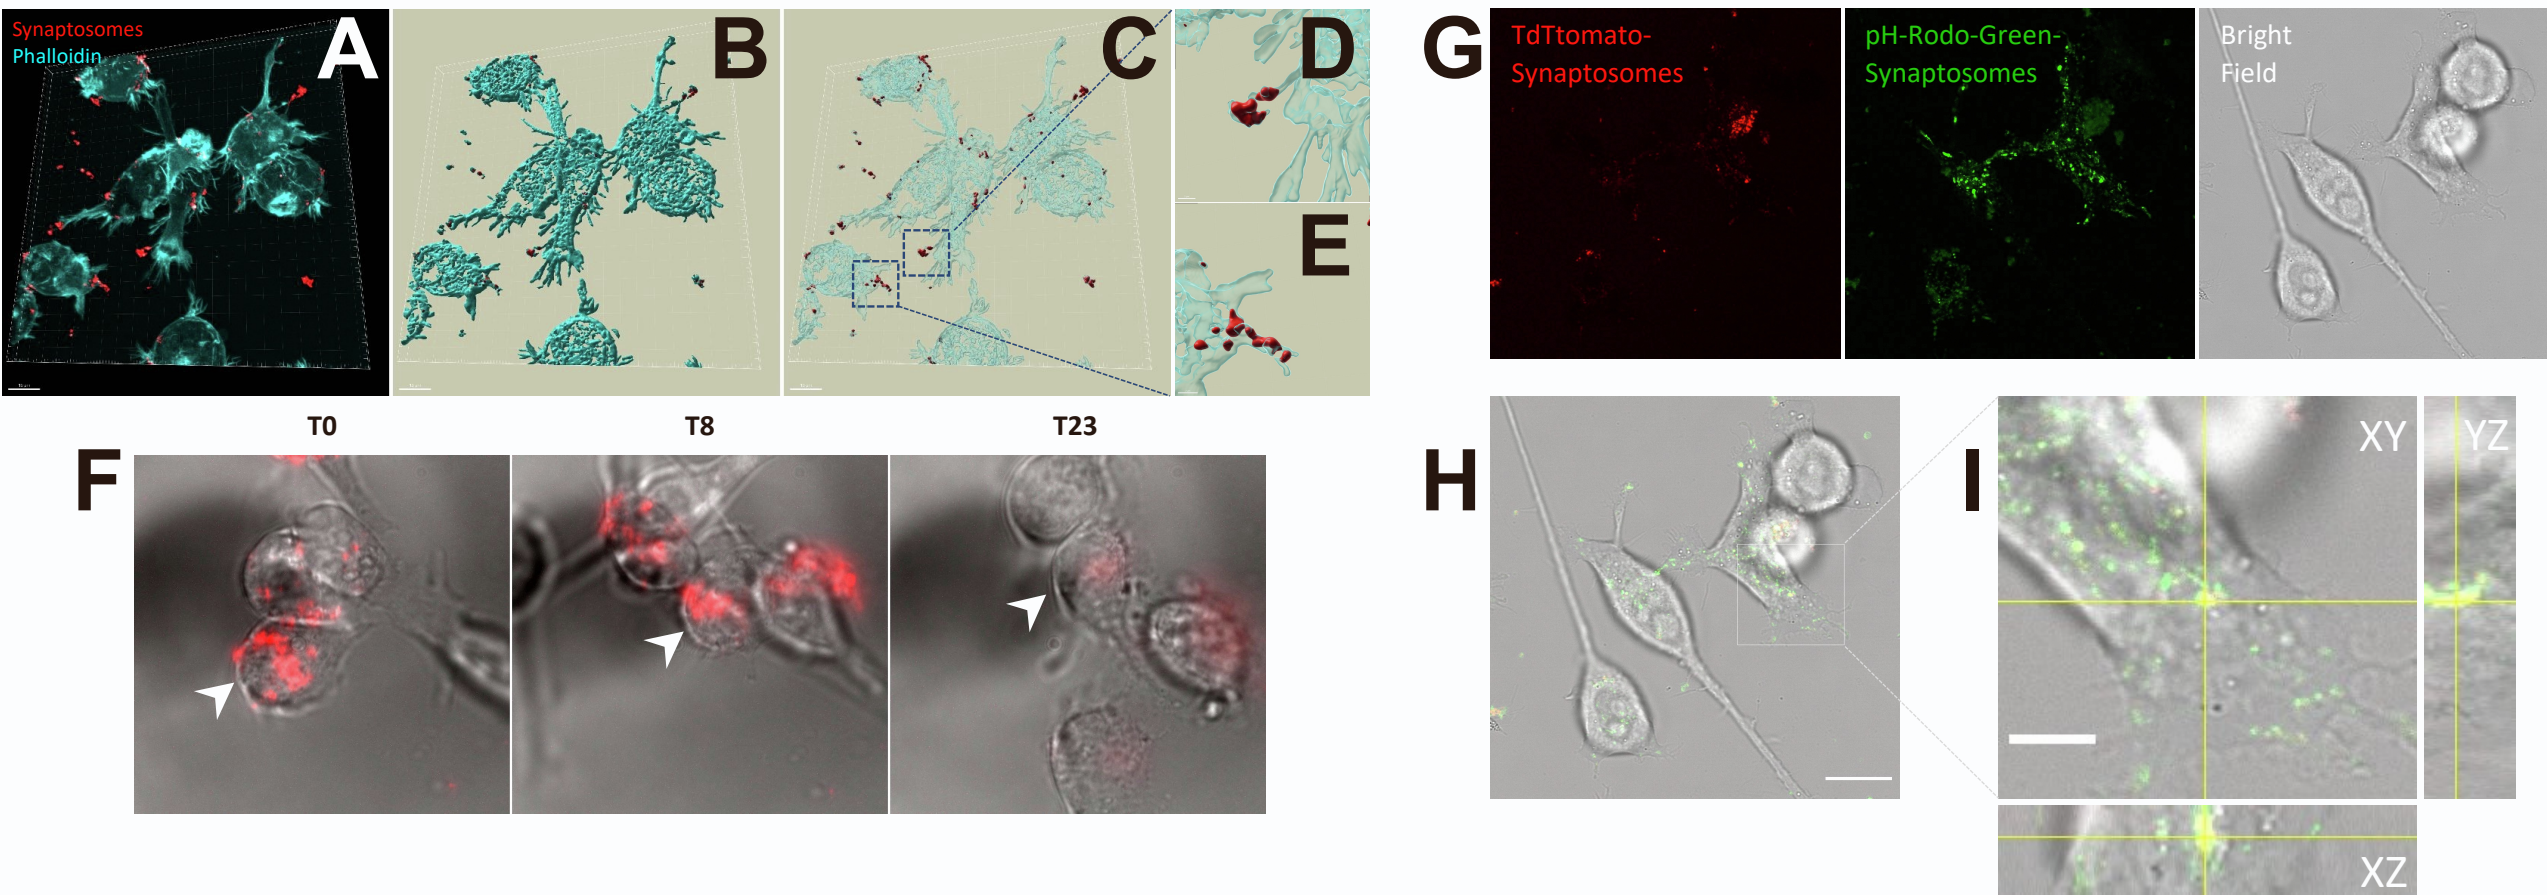

**Supplemental Figure 3. Synaptosome uptake and degradation.- Related to Star Methods** **(A)** Representative Z-stack acquired by confocal microscopy and **(B)** relative three-dimensional reconstruction of BV2 microglial cells labelled by Phalloidin-647, and TdTomato-labelled synaptosomes. **(C)** Volume rendering of microglial cells in transparency confirms internalization of synaptosomes; scale bar: 10µm. **(D,E)** inset of synaptosomal cargoes engulfed by BV2 cells; scalebar: 2µm. **(F)** Time-lapse micrographs of BV2 microglia cells after 1 hour-incubation with TdTomato-positive synaptosomes (T0) and after 120 mins (T8) and 345 mins (T23), acquired by light sheet fluorescent microscopy every 15 minutes, showing progressive degradation of the cargo inside the cell (white arrowhead). **(G)** Max-projection of 5µm z-stack confocal acquisition of TdTomato-labelled synaptosomes, conjugated to pH-Rodo-Green pH-sensitive dye, 3 hours after incubation with BV2 cells. **(H)** Single focal plane of merged channels representing pH-Rodo-Green-positive synaptosomes internalized by microglial cells co-labelled with TdTomato; scale bar: 15µm. **(I)** Orthogonal view of the inset in B, pointing to co-localization across the 5µm Z-stack between TdTomato and pH-Rodo-Green signals; scale bar 5µm.
